# Supplementary material
Source: ML conference proceedings conference paper supplement (https://proceedings.mlr.press/v70/balle17a.html)
Supplement: Supplementary file 1 [file balle17a-supp.pdf]

---

# Spectral Learning from a Single Trajectory under Finite-State Policies (Supplementary Material)

---

Borja Balle Odalric-Ambrym Maillard

## A. Mixing Properties of Probabilistic Automata

**Lemma 2** ( $\eta$ -mixing for PFA) *Let  $\mathbb{A}$  be PFA and assume that it is  $(C, \theta)$ -geometrically mixing in the sense that for some constants  $C > 0, \theta \in (0, 1)$  we have*

$$\forall t \in \mathbb{N}, \quad \mu_t^{\mathbb{A}} = \sup_{\alpha, \alpha'} \frac{\|\alpha A^t - \alpha' A^t\|_1}{\|\alpha - \alpha'\|_1} \leq C\theta^t,$$

where the supremum is over all probability vectors. Then we have  $\eta_{\rho_{\mathbb{A}}} \leq C/(\theta(1-\theta))$ .

---

### Proof of Lemma 2:

---

We start by controlling the term  $\eta$ , defined by

$$\eta_{\rho_{\mathbb{A}}} = 1 + \max_{1 < i < t} \sum_{j=i+1}^t \eta_{i,j},$$

We proceed similarly to Lemma 7 of (Kontorovich & Weiss, 2014). By definition of the total variation norm  $\|\cdot\|_{TV}$ ,

$$\eta_{i,j} = \frac{1}{2} \sup_{u \in \Sigma^{i-1}, \sigma, \sigma' \in \Sigma} \sup_{Z \subseteq \Sigma^{t-j+1}} \left| \frac{\alpha^\top A_u A_\sigma A^{j-i-1} A_Z \beta}{\alpha^\top A_u A_\sigma \beta} - \frac{\alpha^\top A_u A_{\sigma'} A^{j-i-1} A_Z \beta}{\alpha^\top A_u A_{\sigma'} \beta} \right|,$$

where  $A_Z = \sum_{z \in Z} A_z$ . At this point, it is convenient to introduce the vector  $\alpha_{u,\sigma}^\top = \frac{\alpha^\top A_u A_\sigma}{\alpha^\top A_u A_\sigma \beta}$ . Indeed, we then have the rewriting

$$\begin{aligned} \eta_{i,j} &= \frac{1}{2} \sup_{u \in \Sigma^{i-1}, \sigma, \sigma' \in \Sigma} \sup_{Z \subseteq \Sigma^{t-j+1}} \left| (\alpha_{u,\sigma} - \alpha_{u,\sigma'})^\top A^{j-i-1} A_Z \beta \right| \\ &\leq \frac{1}{2} \sup_{u \in \Sigma^{i-1}, \sigma, \sigma' \in \Sigma} \sup_{Z \subseteq \Sigma^{t-j+1}} \|(\alpha_{u,\sigma} - \alpha_{u,\sigma'})^\top A^{j-i-1}\|_1 \|A_Z \beta\|_\infty \end{aligned}$$

where we used a simple application of Hölder inequality. Since  $\mathbb{A}$  is a PFA, we note that  $\|A_Z \beta\|_\infty \leq 1$  because  $\|\sum_{|z|=t-j+1} A_z \beta\|_\infty = 1$  and all the entries are non-negative. Also note that  $\alpha_{u,\sigma}^\top \beta = \|\alpha_{u,\sigma}^\top\|_1 = 1$ . Thus  $\|\alpha_{u,\sigma} - \alpha_{u,\sigma'}\| \leq 2$ . We deduce from these steps that

$$\eta_{i,j} \leq \sup_{\alpha, \alpha'} \frac{\|(\alpha - \alpha')^\top A^{j-i-1}\|_1}{\|\alpha - \alpha'\|_1},$$

where the supremum is taken over all  $\alpha, \alpha'$  that are probability vectors. We note that the later quantity is precisely the definition of the coefficient  $\mu_{j-i-1}^{\mathbb{A}}$ . Assuming  $(C, \theta)$ -geometrically mixing, that is  $\mu_j^{\mathbb{A}} \leq C\theta^j$  for all  $j$ , this implies that

$$\eta_{i,j} \leq C\theta^{j-i-1}.$$

We then deduce that

$$\eta_{\rho_h} \leq 1 + C \max_{1 < i < t} \sum_{j=i+1}^t \theta^{j-i-1} \leq \frac{C}{\theta} (1 + \sum_{j=1}^{t-2} \theta^j) = \frac{C}{\theta} \frac{1 - \theta^{t-1}}{1 - \theta} \leq \frac{C}{\theta(1 - \theta)}. \quad \square$$


---

The following result provides a control of the  $\eta_{\rho_h}$  coefficients, and shows this can be made explicit in specific cases.

**Corollary 1** *Let  $\mathbb{A}$  be PFA with  $n$  states and assume that its matrix  $A$  has a spectral gap, that is  $|\lambda_2(A)| < 1$ . then there exists  $C$  such that  $\eta_{\rho_h} \leq \frac{C}{|\lambda_2(A)|(1-|\lambda_2(A)|)}$ . When the corresponding chain is further aperiodic, irreducible and reversible, we further have  $C \leq \sqrt{n}$ .*

---

**Proof of Corollary 1:**

---

The first part of the result is folklore, and can be proven using some tedious steps involving the Jordan decomposition of the matrix see e.g. Fact 3 in (Rosenthal, 1995).

When the chain is irreducible, aperiodic and more importantly reversible, the spectral gap admits the following characterization, see Lemma 2.2 from (Kontoyiannis & Meyn, 2012):

$$\gamma_2(A) = \lambda_2(A) = \sup \left\{ \frac{\|A\nu\|_2}{\|\nu\|_2} : \nu \text{ s.t. } \|\nu\|_2 \neq 0, \nu^\top \mathbf{1} = 0 \right\}.$$

Thus, from  $\lambda_2(A) < 1$  together with a change of norm from  $\|\cdot\|_1$  to  $\|\cdot\|_2$  and a standard argument (closely following that of Lemma 7), we obtain that

$$\mu_j^{\mathbb{A}} \leq C |\lambda_2|^j,$$

where  $C = \max_{x \in \mathbb{R}^n} \frac{\|x\|_1}{\|x\|_2} = \sqrt{n}$ . □

---

We end this section with a more technical lemma, that is useful to decompose terms in the proof of Theorem 3.

**Lemma 6 (Mixing times of PFA)** *Let  $\mathbb{A} = \langle \alpha, \beta, \{A_\sigma\} \rangle$  be a PFA. Then, for any  $s \geq s' \in \mathbb{N}$  it holds*

$$\|A^{s'} - \beta \alpha^\top A^s\|_\infty \leq 2\mu_{s'}^{\mathbb{A}}.$$

---

**Proof of Lemma 6:**

---

Let denote  $\alpha_s^\top = \alpha^\top A^s$ . We need to bound  $\|A^{s'} - \beta \alpha_s^\top\|_\infty$ . Recall that for any matrix  $M$  the  $\|\cdot\|_\infty$ -induced norm is given by  $\|M\|_\infty = \max_i \sum_j |M(i, j)| = \max_i \|M(i, :)\|_1$ . The  $i$ th row of  $A^{s'} - \beta \alpha_s^\top$  is given by  $e_i^\top A^{s'} - \alpha_s^\top$ , where  $e_i$  is the  $i$ th column of the identity matrix. In particular,  $e_i^\top A^{s'}$  is the distribution over states after starting in state  $i$  and running the chain for  $s'$  steps, and  $\alpha_s^\top$  is the distribution over states starting from the distribution given by  $\alpha$  and running the chain for  $s$  steps. The latter can also be rewritten as  $\alpha_s^\top = \alpha^\top A^s = \alpha^\top A^{s-s'} A^{s'} = \alpha_{s-s'}^\top A^{s'}$ , where  $\alpha_{s-s'}^\top$  is again a distribution over states. Therefore we obtain the desired bound, since:

$$\begin{aligned} \|A^{s'} - \beta \alpha_s^\top\|_\infty &= \max_{i \in [n]} \|e_i^\top A^{s'} - \alpha_{s-s'}^\top A^{s'}\|_1 \\ &\leq \sup_{\alpha_1, \alpha_2} \frac{\|\alpha_1^\top A^{s'} - \alpha_2^\top A^{s'}\|_1}{\|\alpha_1 - \alpha_2\|_1} \|e_i - \alpha_{s-s'}\|_1 \\ &\leq 2\mu_{s'}^{\mathbb{A}}. \end{aligned} \quad \square$$


---

## B. Geometry of Stochastic Weighted Automata

**Lemma 3 (claim (i))** For any  $w \in \Sigma^*$  we have  $\|A_w \beta\|_\beta \leq 1$ .

---

**Proof of Lemma 3 (claim (i)):**

---

We shall use the cone monotonicity property of  $\|\cdot\|_\beta$ , which says that  $0 \leq_{\mathcal{K}} u \leq_{\mathcal{K}} v$  implies  $\|u\|_\beta \leq \|v\|_\beta$ . First note that by construction of  $\mathcal{K}$  we have  $0 \leq_{\mathcal{K}} A_w \beta$ . If we show that  $A_w \beta \leq_{\mathcal{K}} \beta$  also holds, then cone monotonicity implies  $\|A_w \beta\|_\beta \leq \|\beta\|_\beta = 1$ .

To prove the claim note that because  $\beta$  is an eigenvector of  $A$  of eigenvalue 1 we have  $\beta = A^t \beta = \sum_{|w|=t} A_w \beta$ . Therefore,  $\beta - A_w \beta = \sum_{|w'|=|w|, w' \neq w} A_{w'} \beta$  which is a vector in  $\mathcal{K}$  because convex cones are closed under non-negative linear combinations, and we conclude that  $A_w \beta \leq_{\mathcal{K}} \beta$ .  $\square$

---

**Lemma 3 (claim (ii))** For any  $w \in \Sigma^*$  we have  $\|\alpha^\top A_w\|_{\beta,*} = \alpha^\top A_w \beta$ .

---

**Proof of Lemma 3 (claim (ii)):**

---

By unrolling the definitions of the dual norm and  $B_\beta$  we get

$$\|\alpha^\top A_w\|_{\beta,*} = \sup_{-\beta \leq_{\mathcal{K}} v \leq_{\mathcal{K}} \beta} \alpha^\top A_w v .$$

Now note that for any  $v$  such that  $\beta - v \in \mathcal{K}$  we have

$$\alpha^\top A_w v = \alpha^\top A_w \beta - \alpha^\top A_w (\beta - v) \leq \alpha^\top A_w \beta ,$$

where we used that  $\beta - v \in \mathcal{K}$  implies  $A_w (\beta - v) \in \mathcal{K}$  implies  $\alpha^\top A_w (\beta - v) \geq 0$ . Since  $-\beta \leq_{\mathcal{K}} \beta$ , the supremum in the definition of  $\|\alpha^\top A_w\|_{\beta,*}$  is attained at  $v = \beta$  and the result follows.  $\square$

---

## C. Mixing Properties of Stochastic Weighted Automata

**Lemma 4 ( $\eta$ -mixing for SWFA)** Let  $\mathbb{A}$  be SWFA and assume that it is  $(C, \theta)$ -geometrically mixing in the sense that for some  $C \geq 0, \theta \in (0, 1)$ ,

$$\mu_t^{\mathbb{A}} = \sup_{\alpha_0, \alpha_1: \alpha_0^\top \beta = \alpha_1^\top \beta = 1} \frac{\|\alpha_0^\top A^t - \alpha_1^\top A^t\|_{\beta,*}}{\|\alpha_0 - \alpha_1\|_{\beta,*}} \leq C \theta^t .$$

Then the  $\eta$ -mixing coefficient satisfies

$$\eta_{\rho_{\mathbb{A}}} \leq \frac{C}{\theta(1-\theta)} .$$

---

**Proof of Lemma 4:**

---

The proof follows the same initial steps as for Lemma 2. Introducing the vector  $\alpha_{u,\sigma}^\top = \frac{\alpha^\top A_u A_\sigma}{\alpha^\top A_u A_\sigma \beta}$ , we then have the rewriting

$$\begin{aligned} \eta_{i,j} &= \frac{1}{2} \sup_{u \in \Sigma^{i-1}, \sigma, \sigma' \in \Sigma} \sup_{Z \subseteq \Sigma^{t-j+1}} \left| (\alpha_{u,\sigma} - \alpha_{u,\sigma'})^\top A^{j-i-1} A_Z \beta \right| \\ &\leq \frac{1}{2} \sup_{u \in \Sigma^{i-1}, \sigma, \sigma' \in \Sigma} \sup_{Z \subseteq \Sigma^{t-j+1}} \|(\alpha_{u,\sigma} - \alpha_{u,\sigma'})^\top A^{j-i-1}\|_{\beta,*} \|A_Z \beta\|_\beta \end{aligned}$$

where we used a simple application of Hölder inequality and the norm induced by  $\beta$ . Since  $\mathbb{A}$  is a SWFA, the same argument in the proof of Lemma 3 (i) can be used to show that  $\|A_Z \beta\|_\beta \leq 1$  for any  $Z \subseteq \Sigma^{t-j+1}$ . On the other hand, from Lemma 3 (ii) we have  $1 = \alpha_{u,\sigma}^\top \beta = \|\alpha_{u,\sigma}^\top\|_{\beta,*}$ . Thus  $\|\alpha_{u,\sigma} - \alpha_{u,\sigma'}\|_{\beta,*} \leq 2$ . We deduce from these steps that

$$\eta_{i,j} \leq \sup_{\alpha, \alpha'} \frac{\|(\alpha - \alpha')^\top A^{j-i-1}\|_{\beta,*}}{\|\alpha - \alpha'\|_{\beta,*}},$$

where the supremum is taken over all  $\alpha, \alpha'$  that satisfy  $\alpha^\top \beta = 1$ . We note that the later quantity is precisely the definition of the coefficient  $\mu_{j-i-1}^{\mathbb{A}}$ . We then conclude similarly to the proof of Lemma 2.  $\square$

**Lemma 7 (Geometrical mixing of weighted automata)** Let  $\mathbb{A} = \langle \alpha, \beta, \{A_\sigma\} \rangle$  be a stochastic WFA,  $A = \sum_\sigma A_\sigma$ , and

$$\gamma_\beta(A) = \sup \left\{ \frac{\|A\nu\|_{\beta,*}}{\|\nu\|_{\beta,*}} : \nu \text{ s.t. } \|\nu\|_{\beta,*} \neq 0, \nu^\top \beta = 0 \right\}.$$

be its spectral gap with respect to  $\beta$ . It holds that

$$\mu_t^{\mathbb{A}} = \sup_{\alpha_0, \alpha_1: \alpha_0^\top \beta = \alpha_1^\top \beta = 1} \frac{\|\alpha_0^\top A^t - \alpha_1^\top A^t\|_{\beta,*}}{\|\alpha_0 - \alpha_1\|_{\beta,*}} \leq \gamma_\beta(A)^t.$$

### Proof of Lemma 7:

To this end, note that if  $\alpha_0, \alpha_1$  are such that  $\alpha_0^\top \beta = \alpha_1^\top \beta = 1$ , then  $v = \alpha_0 - \alpha_1$  is such that  $v^\top \beta = 0$ . A crucial remark is that since  $A$  is a weighted automaton matrix,  $\alpha_0^\top A \beta = \alpha_1^\top A \beta = 1$  and thus  $w = A(\alpha_0 - \alpha_1)$  also satisfies  $w^\top \beta = 0$ . Likewise,  $(\alpha_0 - \alpha_1)^\top A^t \beta = 0$  for all  $t \in \mathbb{N}$ .

A second remark is that if  $\|A^s v\|_{\beta,*} = 0$  for some  $s < t$ , then  $\|A^t v\|_{\beta,*} = 0$ . Thus, we can restrict to  $v$  such that  $\|A^s v\|_{\beta,*} \neq 0$  for all  $s \leq t$ . Then, it comes for such  $v = \alpha_0 - \alpha_1$ ,

$$\frac{\|A^t v\|_{\beta,*}}{\|v\|_{\beta,*}} = \frac{\|A A^{t-1} v\|_{\beta,*}}{\|A^{t-1} v\|_{\beta,*}} \cdots \frac{\|A v\|_{\beta,*}}{\|v\|_{\beta,*}} \leq \gamma_\beta(A)^t.$$

For the last inequality, we used the fact that since  $A$  is a weighted automaton matrix, and  $v = \alpha_0 - \alpha_1$ , then  $v^\top A^s \beta = 0$  for all  $s$ . This guarantees that indeed  $\frac{\|A A^s v\|_{\beta,*}}{\|A^s v\|_{\beta,*}} \leq \gamma_\beta(A)$  for all  $s$ .  $\square$

**Lemma 8 (Mixing times of SWA)** Let  $\mathbb{A} = \langle \alpha, \beta, \{A_\sigma\} \rangle$  be a SWFA. Then, for all  $s \geq s' \in \mathbb{N}$  it holds

$$\|A^{s'} - \beta \alpha^\top A^s\|_\beta \leq 2\mu_{s'}^{\mathbb{A}}.$$

**Proof of Lemma 8:**

Let  $\alpha_s^\top = \alpha^\top A^s$ . To prove this we proceed as follows:

$$\begin{aligned}
 \|A^{s'} - \beta\alpha_s^\top\|_\beta &= \sup_{\|v\|_\beta \leq 1} \|(A^{s'} - \beta\alpha_s^\top)v\|_\beta \\
 &= \sup_{\|v\|_\beta \leq 1} \sup_{\|u\|_{\beta,*} \leq 1} u^\top (A^{s'} - \beta\alpha_s^\top)v \\
 &= \sup_{\|u\|_{\beta,*} \leq 1} \|u^\top (A^{s'} - \beta\alpha_s^\top)\|_{\beta,*} \\
 &= \sup_{\|u\|_{\beta,*} \leq 1} \|u^\top (A^{s'} - \beta\alpha_{s-s'}^\top A^{s'})\|_{\beta,*} .
 \end{aligned}$$

Next we note that for any  $u$  such that  $\|u\|_{\beta,*} \leq 1$  we have  $|u^\top \beta| \leq 1$ , so:

$$\begin{aligned}
 \|u^\top \beta\alpha_t^\top\|_{\beta,*} &= |u^\top \beta| \|\alpha_t^\top\|_{\beta,*} \\
 &\leq \|\alpha_t^\top\|_{\beta,*} .
 \end{aligned}$$

Furthermore, the same argument we used to show that  $\|\alpha^\top A_x\|_{\beta,*} = \alpha^\top A_x \beta$  implies that  $\|\alpha_t^\top\|_{\beta,*} = \|\alpha^\top A^t\|_{\beta,*} = \alpha^\top A^t \beta = 1$ . Therefore, we see that  $\|u\|_{\beta,*} \leq 1$  implies  $\|u^\top \beta\alpha_t^\top\|_{\beta,*} \leq 1$ , and we get the inequality

$$\begin{aligned}
 \|A^{s'} - \beta\alpha_s^\top\|_\beta &\leq \sup_{\|u_1\|_{\beta,*} \leq 1} \sup_{\|u_2\|_{\beta,*} \leq 1} \|u_1^\top A^{s'} - u_2^\top A^{s'}\|_{\beta,*} \\
 &\leq \mu_{s'}^\Delta \sup_{\|u_1\|_{\beta,*} \leq 1} \sup_{\|u_2\|_{\beta,*} \leq 1} \|u_1 - u_2\|_{\beta,*} \\
 &\leq 2\mu_{s',\beta}^\Delta . \quad \square
 \end{aligned}$$

**D. Single-Trajectory Concentration Inequalities for Probabilistic Automata**

**Theorem 2 (Single-trajectory, entry-wise concentration)** *Let  $\mathbb{A}$  be a PFA that is  $(C, \theta)$ -geometrically mixing, and  $\xi \sim \rho_{\mathbb{A}} \in \mathcal{P}(\Sigma^\omega)$  a trajectory of observations. Then for any  $u \in \mathcal{U}, v \in \mathcal{V}$  and  $\delta \in (0, 1)$  it holds*

$$\mathbb{P}\left(\widehat{H}_{t,\xi}^{\mathcal{U},\mathcal{V}}(u,v) - \bar{H}_t^{\mathcal{U},\mathcal{V}}(u,v) > \frac{|uv|C}{\theta(1-\theta)} \sqrt{\left(1 + \frac{|uv|-1}{t}\right) \frac{\ln(1/\delta)}{2t}}\right) \leq \delta .$$

**Proof of Theorem 2:**

We control  $\eta_{\rho_{\mathbb{A}}}$  by a direct application of Lemma 2.

**Control of  $\|g\|_{Lip}$ :** Let us fix  $u \in \mathcal{U}, v \in \mathcal{V}$  define  $g(\xi) = t\widehat{H}_{t,\xi}^{\mathcal{U},\mathcal{V}}(u,v)$ . We first control the regularity of  $f$ .

To this end, let  $\xi'$  be a trajectory  $\xi' = x_1, \dots, x_{k-1}, x'_k, x_{k+1}, \dots, x_\ell$  that only differs by one element from  $\xi$ , say at position  $k$ . Then, we get for any  $u, v$

$$\begin{aligned}
 g(\xi) - g(\xi') &= \sum_{s=1}^t (\mathbb{I}\{x_s \dots x_{s+|uv|-1} = uv\} - \mathbb{I}\{x_s \dots x'_k \dots x_{s+|uv|-1} = uv\}) \\
 &\leq |\{s \in [1, t] : k \in [s : s + |uv| - 1]\}| .
 \end{aligned}$$

Now, in order to bound  $|\{s \in [1, t] : k \in [s : s + |uv| - 1]\}|$  note that  $k \in [s : s + |uv| - 1]$  if and only if  $s \leq k \leq s + |uv| - 1$ . From the first inequality we see that  $s \leq k$ , and from the second one  $s \geq k - |uv| + 1$ . Combined with the restrictions on  $s$ , this means that

$$|\{s \in [1, t] : k \in [s : s + |uv| - 1]\}| = |\{\max\{1, k - |uv| + 1\}, \min\{k, t\}\}| \leq |uv|,$$

which show that  $\|g\|_{Lip} \leq |uv|$ .

**Combining the two quantities** Combining these two results, and noting that  $t + |uv| - 1$  symbols appears in  $g(\xi)$ , we deduce that  $\forall \varepsilon > 0$ ,

$$\mathbb{P}\left(t(\widehat{H}_{t,\xi}^{\mathcal{U},\mathcal{V}}(u,v) - \bar{H}_t^{\mathcal{U},\mathcal{V}}(u,v)) > |uv|(t + |uv| - 1)\varepsilon\right) \leq \exp\left(-\frac{2(t + |uv| - 1)\theta^2(1 - \theta)^2\varepsilon^2}{C^2}\right),$$

or equivalently, for all  $\delta \in (0, 1)$ ,

$$\mathbb{P}\left(\widehat{H}_{t,\xi}^{\mathcal{U},\mathcal{V}}(u,v) - \bar{H}_t^{\mathcal{U},\mathcal{V}}(u,v) > \frac{\sqrt{t + |uv| - 1}|uv|}{t} \frac{C}{\theta(1 - \theta)} \sqrt{\frac{\ln(1/\delta)}{2t}}\right) \leq \delta. \quad \square$$


---

The proof of following result is more challenging.

**Theorem 3 (Single-trajectory, matrix-wise)** Let  $\rho_{\mathbb{A}} \in \mathcal{P}(\Sigma^\omega)$  be as in Theorem 2 and define the probability mass  $m^{\mathcal{U},\mathcal{V}} = \sum_{u \in \mathcal{U}, v \in \mathcal{V}} \bar{f}_t(uv)$ . Then, for all  $\delta \in (0, 1)$ ,

$$\begin{aligned} & \mathbb{P}\left(\|\widehat{H}_t^{\mathcal{U},\mathcal{V}} - \bar{H}_t^{\mathcal{U},\mathcal{V}}\|_2 \geq \left(\sqrt{L} + \sqrt{\frac{2C}{1 - \theta}}\right) \sqrt{\frac{2m^{\mathcal{U},\mathcal{V}}}{t}} \right. \\ & \left. + \frac{2LC}{\theta(1 - \theta)} \sqrt{\left(1 + \frac{L - 1}{t}\right) \frac{\min\{|\mathcal{U}||\mathcal{V}|, 2n_{\mathcal{U}}n_{\mathcal{V}}\} \ln(1/\delta)}{2t}}\right) \leq \delta. \end{aligned}$$

---

**Proof of Theorem 3:**

---

Let us introduce the function  $g(\xi) = \|\widehat{H}_t^{\mathcal{U},\mathcal{V}} - \bar{H}_t^{\mathcal{U},\mathcal{V}}\|_2$ . We first control  $\|g\|_{Lip}$  then  $\mathbb{E}[g(\xi)]$ , before applying Theorem 1.

---

**Step 1: Control of  $\|g\|_{Lip}$ .** In this step, we show that

$$\|g\|_{Lip} \leq \frac{L}{t} \sqrt{\min\{|\mathcal{U}||\mathcal{V}|, 2n_{\mathcal{U}}n_{\mathcal{V}}\}}$$

where  $L = \max_{u \in \mathcal{U}, v \in \mathcal{V}} |uv|$  denote the maximal length of words in  $U \cdot V$  and  $n_{\mathcal{U}} = |\{\ell \in [0, L] : |U_\ell| > 0\}|$ ,  $n_{\mathcal{V}} = |\{\ell \in [0, L] : |V_\ell| > 0\}|$ , denote the number lengths such that the set  $U_\ell = \{u \in \mathcal{U} : |u| = \ell\}$  (respectively  $V_\ell = \{v \in \mathcal{V} : |v| = \ell\}$ ) is non empty. Note that the second term in the min can be exponentially smaller than the first. For example, taking  $U = V = \Sigma^{\leq L/2}$  we have  $|U||V| = \Theta(|\Sigma|^L)$  while  $n_{\mathcal{U}}n_{\mathcal{V}} = \Theta(L^2)$ .

**Step 1.1.** Let  $\xi' \sim p$  be a trajectory  $\xi' = x_1, \dots, x_{k-1}, x'_k, x_{k+1}, \dots, x_\ell$  that only differs by one

element from  $\xi$ , say at position  $k$ . We note that

$$\begin{aligned} & \left| \|\widehat{H}_{t,\xi}^{\mathcal{U},\mathcal{V}} - \bar{H}_t^{\mathcal{U},\mathcal{V}}\|_2 - \|\widehat{H}_{t,\xi'}^{\mathcal{U},\mathcal{V}} - \bar{H}_t^{\mathcal{U},\mathcal{V}}\|_2 \right| \leq \|\widehat{H}_{t,\xi}^{\mathcal{U},\mathcal{V}} - \widehat{H}_{t,\xi'}^{\mathcal{U},\mathcal{V}}\|_2 \\ &= \sup_{q \in \mathbb{R}^{\mathcal{V}}} \frac{1}{t\|q\|_2} \sqrt{\sum_{u \in \mathcal{U}} \left( \sum_{v \in \mathcal{V}} \sum_{s=1}^t (\mathbb{I}\{x_s \dots x_{s+|uv|-1} = uv\} - \mathbb{I}\{x_s \dots x'_k \dots x_{s+|uv|-1} = uv\}) q_v \right)^2} \\ &\leq \sup_{q \in \mathbb{R}^{\mathcal{V}}} \frac{1}{t\|q\|_2} \sqrt{\sum_{u \in \mathcal{U}} \left( \sum_{v \in \mathcal{V}} |uv| q_v \right)^2} \leq \sup_{q \in \mathbb{R}^{\mathcal{V}}} \frac{1}{t\|q\|_2} \sqrt{\sum_{u \in \mathcal{U}} \sum_{v \in \mathcal{V}} |uv|^2} \sqrt{\sum_{v \in \mathcal{V}} q_v^2}. \end{aligned}$$

Let  $L = \max_{u \in \mathcal{U}, v \in \mathcal{V}} |uv|$ . A simple bound is then  $\|g\|_{Lip} \leq \frac{L}{t} \sqrt{|\mathcal{U}||\mathcal{V}|}$ , which is essentially optimal if all words  $uv$ ,  $u \in \mathcal{U}$ ,  $v \in \mathcal{V}$  have same length.

**Step 1.2.** A more refined bound may be helpful in case many words have length  $|uv|$  much smaller than  $L$ . To this end, let us write  $\widehat{H}_t^{\mathcal{U},\mathcal{V}} = \frac{1}{t} \sum_{s=1}^t M_s$  with  $M_s(u, v) = b_{s,uv} = \mathbb{I}\{x_s \dots x_{s+|uv|-1} = uv\}$ . Similarly, let  $\widehat{H}_{t,\xi'}^{\mathcal{U},\mathcal{V}} = \frac{1}{t} \sum_{s=1}^t M'_s$  with the obvious definition. Now, by the same argument we used to bound  $\|g\|_{Lip}$  in the entry-wise case, we have

$$t \left( \widehat{H}_{t,\xi}^{\mathcal{U},\mathcal{V}} - \widehat{H}_{t,\xi'}^{\mathcal{U},\mathcal{V}} \right) = \sum_{s=k-L+1}^k M_s - M'_s = \sum_{s=k-L+1}^k \Delta_s,$$

since for  $s < k - L + 1$  or  $s > k$  we must have  $M_s = M'_s$ .

Now let us partition the sets  $\mathcal{U}$  and  $\mathcal{V}$  as disjoint unions of sets with strings of the same length. That is, we write  $\mathcal{U} = \cup_{\ell=0}^L U_\ell$  with  $U_\ell = \mathcal{U} \cap \Sigma^\ell$ , and  $\mathcal{V} = \cup_{\ell=0}^L V_\ell$  with analogous definitions. This allows us to write  $M_s \in \{0, 1\}^{U \times V}$  as a block matrix  $M_s = (M_s^{i,j})_{0 \leq i,j \leq L}$  with  $M_s^{i,j} \in \{0, 1\}^{U_i \times V_j}$ .

For simplicity of notation, in the sequel we are assuming that  $U_\ell, V_\ell \neq \emptyset$  for all  $0 \leq \ell \leq L$ , but the argument remains the same after we remove the empty sets of rows and columns. Note that by definition we have  $M_s^{i,j}(u, v) = \mathbb{I}\{x_s \dots x_{s+i+j-1} = uv\}$  for any  $u \in U_i$  and  $v \in V_j$ . This implies that each of the block matrices  $M_s^{i,j}$  contains *at most one non-zero entry*.

If we make analogous definitions and write  $M'_s = (M_s'^{i,j})_{0 \leq i,j \leq L}$ , then we obtain a block decomposition for  $\Delta_s = M_s - M'_s = (\Delta_s^{i,j})_{0 \leq i,j \leq L}$  where each block is either:

1. zero,
2. a  $\{0, 1\}$ -matrix with a single 1,
3. a  $\{0, -1\}$ -matrix with a single  $-1$ ,
4. a  $\{0, 1, -1\}$ -matrix with a single 1 and a single  $-1$ .

In any of these cases one can see that the bound  $\|\Delta_s^{i,j}\|_2 \leq \|\Delta_s^{i,j}\|_F \leq \sqrt{2}$  is always satisfied. Therefore, we have  $\|\Delta_s\|_2^2 \leq \|\Delta_s\|_F^2 = \sum_{i,j} \|\Delta_s^{i,j}\|_F^2 \leq 2n_{\mathcal{U}}n_{\mathcal{V}}$ , where

$$\begin{aligned} n_{\mathcal{U}} &= |\ell \in [0, L] : |U_\ell| > 0|, \\ n_{\mathcal{V}} &= |\ell \in [0, L] : |V_\ell| > 0|. \end{aligned}$$

By plugging these estimates into  $\widehat{H}_{t,\xi}^{\mathcal{U},\mathcal{V}} - \widehat{H}_{t,\xi'}^{\mathcal{U},\mathcal{V}}$  we finally get

$$\|\widehat{H}_{t,\xi}^{\mathcal{U},\mathcal{V}} - \widehat{H}_{t,\xi'}^{\mathcal{U},\mathcal{V}}\|_2 \leq \frac{L\sqrt{2n_{\mathcal{U}}n_{\mathcal{V}}}}{t}.$$

Therefore we obtain the bound  $\|g\|_{Lip} \leq (L\sqrt{2n_{\mathcal{U}}n_{\mathcal{V}}})/t$ .

**Control of  $\mathbb{E}[g(\xi)]$ .** We now want to control the following quantity  $\mathbb{E}[\|\widehat{H}_t^{\mathcal{U},\mathcal{V}} - \bar{H}_t^{\mathcal{U},\mathcal{V}}\|_2]$ . More precisely, we show in this step that

$$\mathbb{E}[\|\widehat{H}_t^{\mathcal{U},\mathcal{V}} - \bar{H}_t^{\mathcal{U},\mathcal{V}}\|_2]^2 \leq \frac{O\left(L^2 + \frac{1}{1-\theta}\right) \left(\sum_{u \in \mathcal{U}, v \in \mathcal{V}} \bar{f}_t(uv)\right)}{t},$$

where  $L = \max_{w \in \mathcal{U} \cdot \mathcal{V}} |w|$ , and  $\bar{f}_t(w) = \frac{1}{t} \sum_{s=1}^t f_s(w)$ , where  $f_s(w) = \mathbb{P}[\xi \in \Sigma^{s-1} w \Sigma^\omega]$ .

**Step 2.1.** Let  $q \in \mathbb{R}^{\mathcal{V}}$  be a unit vector ( $\|q\|_2 = 1$ ). Then, by Jensen's inequality, the norm of  $\widehat{H}_t^{\mathcal{U},\mathcal{V}} - \bar{H}_t^{\mathcal{U},\mathcal{V}}$  is controlled by its Frobenius norm

$$\begin{aligned} \mathbb{E}[\|\widehat{H}_t^{\mathcal{U},\mathcal{V}} - \bar{H}_t^{\mathcal{U},\mathcal{V}}\|_2]^2 &\leq \mathbb{E}[\|\widehat{H}_t^{\mathcal{U},\mathcal{V}} - \bar{H}_t^{\mathcal{U},\mathcal{V}}\|_2^2] \\ &\leq \mathbb{E}\left[\sum_{u \in \mathcal{U}} \left(\sum_{v \in \mathcal{V}} (\widehat{H}_t^{\mathcal{U},\mathcal{V}}(u, v) - \bar{H}_t^{\mathcal{U},\mathcal{V}}(u, v)) q_v\right)^2\right] \\ &\leq \sum_{u \in \mathcal{U}} \sum_{v \in \mathcal{V}} \mathbb{E}[(\widehat{H}_t^{\mathcal{U},\mathcal{V}}(u, v) - \bar{H}_t^{\mathcal{U},\mathcal{V}}(u, v))^2] \\ &= \sum_{w \in \mathcal{U} \cdot \mathcal{V}} |w|_{\mathcal{U}, \mathcal{V}} \mathbb{E}[(\widehat{f}_t(w) - \bar{f}_t(w))^2], \end{aligned}$$

where  $\mathcal{U} \cdot \mathcal{V}$  is the set of all words of the form  $u \cdot v$  with  $u \in \mathcal{U}$  and  $v \in \mathcal{V}$ ;  $|w|_{\mathcal{U}, \mathcal{V}} = |\{(u, v) \in \mathcal{U} \times \mathcal{V} : u \cdot v = w\}|$ , and  $\widehat{f}_t(w) = \frac{1}{t} \sum_{s=1}^t b_{s,w}$  with the notation defined above. We also use  $\bar{f}_t(w) = \mathbb{E}[\widehat{f}_t(w)] = \frac{1}{t} \sum_{s=1}^t f_s(w)$ , where  $f_s(w) = \mathbb{P}[\xi \in \Sigma^{s-1} w \Sigma^\omega]$ . This implies that we have a sum of variances, and each of them can be written as

$$\mathbb{E}[(\widehat{f}_t(w) - \bar{f}_t(w))^2] = \mathbb{E}[\widehat{f}_t(w)^2] - \bar{f}_t(w)^2.$$

An important first observation is that we can write  $f_s(w) = \alpha^\top A^{s-1} A_w \beta$ . Furthermore, it follows from  $A$  being a probabilistic automaton that  $\sum_{|w|=l} f_s(w) = 1$  for all  $s$  and  $l$ . This suggests that we group the terms in the sum over  $W = \mathcal{U} \cdot \mathcal{V}$  by length, so we write  $W_l = W \cap \Sigma^l$  and define  $L_l = \max_{w \in W_l} |w|_{\mathcal{U}, \mathcal{V}}$  the maximum number of ways to write a string of length  $l$  in  $W$  as a product of a prefix in  $\mathcal{U}$  and a suffix in  $\mathcal{V}$ . Note that we always have  $L_l \leq l + 1$ . Henceforth, we want to control the following terms for all possible values of  $l$ :

$$\sum_{w \in W_l} |w|_{\mathcal{U}, \mathcal{V}} \left( \mathbb{E}[\widehat{f}_t(w)^2] - \bar{f}_t(w)^2 \right) = \frac{1}{t^2} \sum_{w \in W_l} |w|_{\mathcal{U}, \mathcal{V}} \left[ \mathbb{E} \left[ \left( \sum_{s=1}^t b_{s,w} \right)^2 \right] - \left( \sum_{s=1}^t f_s(w) \right)^2 \right].$$

**Step 2.2.** Let us focus on each of the quadratic terms. On the one hand, it holds

$$\left( \sum_{s=1}^t f_s(w) \right)^2 = \sum_{s=1}^t f_s(w)^2 + 2 \sum_{1 \leq s < s' \leq t} f_s(w) f_{s'}(w),$$

while other on the other hand, we get

$$\mathbb{E} \left[ \left( \sum_{s=1}^t b_{s,w} \right)^2 \right] = \sum_{s=1}^t \mathbb{E}[b_{s,w}^2] + 2 \sum_{1 \leq s < s' \leq t} \mathbb{E}[b_{s,w} b_{s',w}].$$

Hence this enables to derive the following bound

$$\begin{aligned} \mathbb{E}[\|\widehat{H}_t^{\mathcal{U},\mathcal{V}} - \bar{H}_t^{\mathcal{U},\mathcal{V}}\|_2]^2 &\leq \frac{1}{t^2} \sum_{l=0}^{\infty} \sum_{w \in W_l} |w|_{\mathcal{U}, \mathcal{V}} \left[ \sum_{s=1}^t (1 - f_s(w)) f_s(w) \right. \\ &\quad \left. + 2 \sum_{1 \leq s < s' \leq t} \left( \mathbb{E}[b_{s,w} b_{s',w}] - f_s(w) f_{s'}(w) \right) \right]. \end{aligned} \quad (6)$$



**Step 2.3.** In order to control the first term in (6), we remark that

$$\begin{aligned}
 \sum_{l=0}^{\infty} \sum_{w \in W_l} |w|_{\mathcal{U}, \mathcal{V}} \sum_{s=1}^t (1 - f_s(w)) f_s(w) &= \sum_{u \in \mathcal{U}, v \in \mathcal{V}} \sum_{s=1}^t (1 - f_s(uv)) f_s(uv) \\
 &\leq \sum_{u \in \mathcal{U}, v \in \mathcal{V}} \sum_{s=1}^t f_s(uv) \\
 &= t \sum_{u \in \mathcal{U}, v \in \mathcal{V}} \bar{f}_t(uv). \tag{7}
 \end{aligned}$$

**Step 2.4.** We thus focus on controlling the remaining "cross"-term in (6) and to this end we study, for  $w \in W_l$ , the quantity

$$\mathbb{E}[b_{s,w} b_{s',w}] - f_s(w) f_{s'}(w) = \mathbb{P}[\xi \in \Sigma^{s-1} \Sigma_w^{s'-s} \Sigma^w] - (\alpha^\top A^{s-1} A_w \beta) (\alpha^\top A^{s'-1} A_w \beta),$$

where we introduced for convenience the set  $\Sigma_w^{s'-s} = w \Sigma^{s'-s} \cap \Sigma^{s'-s} w$ . Introducing as well the vectors  $\alpha_{s-1}^\top = \alpha^\top A^{s-1}$ ,  $\alpha_{s'-1}^\top = \alpha^\top A^{s'-1}$  and the transition matrix  $A_w^{s'-s} = \sum_{x \in \Sigma_w^{s'-s}} A_x$  corresponding to the "event"  $\Sigma_w^{s'-s}$ , it comes

$$\mathbb{E}[b_{s,w} b_{s',w}] - f_s(w) f_{s'}(w) = \alpha_{s-1}^\top \left( A_w^{s'-s} - A_w \beta \alpha_{s'-1}^\top A_w \right) \beta.$$

We now discuss two cases. First the case when  $s' - s \geq l$ , then the case when  $s' - s < l$ .

Note that if  $s' - s \geq |w| = l$ , then  $\Sigma_w^{s'-s}$  simplifies to  $\Sigma_w^{s'-s} = w \Sigma^{s'-s-l} w$  and thus  $A_w^{s'-s} = A_w A^{s'-s-l} A_w$ . For such words, we thus obtain

$$\begin{aligned}
 \alpha_{s-1}^\top \left( A_w^{s'-s} - A_w \beta \alpha_{s'-1}^\top A_w \right) \beta &= \alpha_{s-1}^\top A_w \left( A^{s'-s-l} - \beta \alpha_{s'-1}^\top \right) A_w \beta \\
 &\leq \|\alpha_{s-1}^\top A_w\|_1 \|A^{s'-s-l} - \beta \alpha_{s'-1}^\top\|_\infty \|A_w \beta\|_\infty.
 \end{aligned}$$

Moreover, from Lemma 6, it holds  $\|A^{s'-s-l} - \beta \alpha_{s'-1}^\top\|_\infty \leq 2\mu_{s'-s-l}^\Delta$ . Also, it holds that  $\|A_w \beta\|_\infty \leq 1$ . Finally, since  $\alpha_{s-1}^\top A_w$  is a sub-distribution over states, we have

$$\begin{aligned}
 \sum_{w \in W_l} |w|_{\mathcal{U}, \mathcal{V}} \|\alpha_{s-1}^\top A_w\|_1 &= \sum_{w \in W_l} |w|_{\mathcal{U}, \mathcal{V}} \alpha_{s-1}^\top A_w \beta \\
 &= \sum_{w \in W_l} |w|_{\mathcal{U}, \mathcal{V}} f_s(w) = \sum_{u \in \mathcal{U}, v \in \mathcal{V}: uv \in W_l} f_s(uv).
 \end{aligned}$$

Now, on the other hand if  $s' - s < l$ , using the fact that  $\Sigma_w^{s'-s} \subset w \Sigma^{s'-s}$ , then

$$\begin{aligned}
 \alpha_{s-1}^\top \left( A_w^{s'-s} - A_w \beta \alpha_{s'-1}^\top A_w \right) \beta &\leq \alpha_{s-1}^\top A_w \left( A^{s'-s} - \beta \alpha_{s'-1}^\top A_w \right) \beta \\
 &= f_s(w) (1 - f_{s'}(w)) \leq f_s(w).
 \end{aligned}$$

So in this case we again see that  $\sum_{w \in W_l} |w|_{\mathcal{U}, \mathcal{V}} f_s(w) = \sum_{u \in \mathcal{U}, v \in \mathcal{V}: uv \in W_l} f_s(uv)$ .

**Step 2.5.** Therefore, combining the above steps, so far we have seen that for a fixed  $l \geq 0$ , the sum  $\sum_{w \in W_l} |w|_{\mathcal{U}, \mathcal{V}} \sum_{1 \leq s < s' \leq t} (\mathbb{E}[b_{s,w} b_{s',w}] - f_s(w) f_{s'}(w))$  is upper bounded by:

$$\begin{aligned}
 &\sum_{1 \leq s < s' \leq t} \sum_{u \in \mathcal{U}, v \in \mathcal{V}: |uv|=l} f_s(uv) (2\mu_{s'-s-l}^\Delta \mathbb{I}\{s' - s \geq l\} + \mathbb{I}\{s' - s < l\}) \\
 &= \sum_{u \in \mathcal{U}, v \in \mathcal{V}: |uv|=l} \sum_{s=1}^{t-1} f_s(uv) \left[ \sum_{s'=s+1}^t 2\mu_{s'-s-l}^\Delta \mathbb{I}\{s' - s \geq l\} + \mathbb{I}\{s' - s < l\} \right].
 \end{aligned}$$

Now note that  $\sum_{s'=s+1}^t \mathbb{I}\{s' - s < l\} = \min\{l-1, t-s\} \leq l-1$ . Furthermore, using that  $\mu_t^\Delta \leq C\theta^t$  we get

$$\begin{aligned} \sum_{s'=s+1}^t \mu_{s'-s-l}^\Delta \mathbb{I}\{s' - s \geq l\} &= \mathbb{I}\{t \geq s+l\} \sum_{k=0}^{t-s-l} \mu_k^\Delta \\ &\leq C \mathbb{I}\{t \geq s+l\} \frac{1 - \theta^{t-s-l+1}}{1 - \theta} \leq \frac{C}{1 - \theta}. \end{aligned}$$

In conclusion, we get

$$\begin{aligned} &\sum_{u \in \mathcal{U}, v \in \mathcal{V}: |uv|=l} \sum_{s=1}^{t-1} f_s(uv) \left[ \sum_{s'=s+1}^t 2\mu_{s'-s-l}^\Delta \mathbb{I}\{s' - s \geq l\} + \mathbb{I}\{s' - s < l\} \right] \\ &\leq \left( l-1 + \frac{2C}{1-\theta} \right) \sum_{u \in \mathcal{U}, v \in \mathcal{V}: |uv|=l} \sum_{s=1}^{t-1} f_s(uv) \\ &\leq t \left( l-1 + \frac{2C}{1-\theta} \right) \sum_{u \in \mathcal{U}, v \in \mathcal{V}: |uv|=l} \bar{f}_t(uv). \end{aligned}$$

Finally, putting all the pieces together and introducing  $L = \max_{w \in \mathcal{U} \cdot \mathcal{V}} |w|$ , we get from equations (6), (7), (8),

$$\begin{aligned} \mathbb{E}[\|\hat{H}_t^{\mathcal{U}, \mathcal{V}} - \bar{H}_t^{\mathcal{U}, \mathcal{V}}\|_2]^2 &\leq \frac{\sum_{u \in \mathcal{U}, v \in \mathcal{V}} \bar{f}_t(uv)}{t} + \frac{2}{t} \sum_{l=0}^{\infty} \sum_{u \in \mathcal{U}, v \in \mathcal{V}: |uv|=l} \bar{f}_t(uv) (l-1 + \frac{2C}{1-\theta}) \\ &\leq \left[ 2L-1 + \frac{4C}{1-\theta} \right] \frac{\sum_{u \in \mathcal{U}, v \in \mathcal{V}} \bar{f}_t(uv)}{t}. \end{aligned}$$

**Step 3. Application of Theorem 1.** It remains to apply Theorem 1 with

$$\begin{aligned} \|g\|_{Lip} &\leq \frac{L}{t} \sqrt{\min\{|\mathcal{U}||\mathcal{V}|, 2n_{\mathcal{U}}n_{\mathcal{V}}\}}, \\ \mathbb{E}[\|\hat{H}_t^{\mathcal{U}, \mathcal{V}} - \bar{H}_t^{\mathcal{U}, \mathcal{V}}\|_2] &\leq \left( \sqrt{L} + \sqrt{\frac{2C}{1-\theta}} \right) \sqrt{\frac{2 \sum_{u \in \mathcal{U}, v \in \mathcal{V}} \bar{f}_t(uv)}{t}}, \end{aligned}$$

for some constant  $C$ . After some rewriting, it comes

$$\begin{aligned} \mathbb{P} \left( \|\hat{H}_t^{\mathcal{U}, \mathcal{V}} - \bar{H}_t^{\mathcal{U}, \mathcal{V}}\|_2 > \left( \sqrt{L} + \sqrt{\frac{2C}{1-\theta}} \right) \sqrt{\frac{2 \sum_{u \in \mathcal{U}, v \in \mathcal{V}} \bar{f}_t(uv)}{t}} \right. \\ \left. + \frac{LC}{(1-\theta)} \sqrt{\left( 1 + \frac{L-1}{t} \right) \frac{\min\{|\mathcal{U}||\mathcal{V}|, 2n_{\mathcal{U}}n_{\mathcal{V}}\} \ln(1/\delta)}{2t}} \right) \leq \delta. \quad \square \end{aligned}$$

## E. Single-Trajectory Hankel Concentration Inequalities with Finite-State Control

**Lemma 5** *The Hankel matrix  $\hat{H} = \hat{H}_{t, \xi}^{\mathcal{U}, \mathcal{V}}$  computed in Algorithm 3 satisfies  $\mathbb{E}[\hat{H}_{t, \xi}^{\mathcal{U}, \mathcal{V}}] = \bar{H}_t^{\mathcal{U}, \mathcal{V}}$ , where  $\hat{H}_t^{\mathcal{U}, \mathcal{V}}$  is a block of the Hankel matrix corresponding to the stochastic WFA  $\tilde{\mathbb{A}}_t = \langle \tilde{\alpha}_t, \beta, \{A_\sigma\} \rangle$  where we introduced the modified vector  $\tilde{\alpha}_t = (1/t) \sum_{s=0}^{t-1} \alpha^\top(A/\kappa)^s$ . We denote by  $\bar{f}_t$  the function computed by  $\tilde{\mathbb{A}}_t$ .*

---

**Proof of Lemma 5:**


---

For any  $t \geq 0$  and  $w \in \Sigma^*$  let us define the function  $\varphi_{s,w} : \Sigma^\omega \rightarrow \mathbb{R}$  given by

$$\varphi_{s,w}(x) = \frac{\mathbb{I}\{o_{s+1}a_{s+1} \cdots o_{s+|w|}a_{s+|w|} = w\}}{\kappa^s \pi(a_1 \cdots a_{s+|w|} | o_1 \cdots o_{s+|w|})},$$

where  $x = (o_1, a_1)(o_2, a_2) \cdots$ . Thus, the entries of the Hankel matrix computed in Algorithm 3 can be written as  $\widehat{H}(u, v) = (1/t) \sum_{s=0}^{t-1} \varphi_{s,uv}(\xi)$ . Now note that the expectation  $\mathbb{E}[\varphi_{s,w}]$  with respect to a trajectory  $\xi \sim \rho_{\mathbb{B}}$  can be written as

$$\begin{aligned} \sum_{w' \in \Sigma^s} \frac{\mathbb{P}[\xi \in w'w \Sigma^\omega]}{\kappa^s \pi(w'Aw' | w'Ow'O)} &= \sum_{w' \in \Sigma^s} \frac{f_{\mathbb{B}}(w'w)}{\kappa^s f_{\mathbb{A}\pi}(w'w)} \\ &= \sum_{w' \in \Sigma^s} \frac{f_{\mathbb{A}}(w'w)}{\kappa^s} = \frac{\alpha^\top A^s A_w \beta}{\kappa^s}. \end{aligned}$$

Therefore, the Hankel matrix  $\widehat{H} = \widehat{H}_{t,\xi}^{\mathcal{U},\mathcal{V}}$  computed in Algorithm 3 satisfies  $\mathbb{E}[\widehat{H}_{t,\xi}^{\mathcal{U},\mathcal{V}}] = \widetilde{H}_t^{\mathcal{U},\mathcal{V}}$ , where  $\widetilde{H}_t^{\mathcal{U},\mathcal{V}}$  is a block of the Hankel matrix corresponding to the stochastic WFA  $\widetilde{\mathbb{A}}_t = \langle \widetilde{\alpha}_t, \beta, \{A_\sigma\} \rangle$  with modified vector  $\widetilde{\alpha}_t = (1/t) \sum_{s=0}^{t-1} \alpha^\top (A/\kappa)^s$ . We denote by  $\widetilde{f}_t$  the function computed by  $\widetilde{\mathbb{A}}_t$ .  $\square$

---

**Theorem 6 (Controlled case, single-trajectory, matrix-wise)** *Let  $\mathbb{A} = \langle \alpha, \beta, \{A_\sigma\} \rangle$  be a stochastic environment and  $\pi$  a stochastic policy induced by a probabilistic automaton  $\mathbb{A}_\pi$ , both over  $\Sigma = \mathcal{A} \times \mathcal{O}$ . Let  $\mathbb{B} = \mathbb{A} \otimes \mathbb{A}_\pi$  be the stochastic WFA obtained by coupling the environment and the policy and  $\rho_{\mathbb{B}} \in \mathcal{P}(\Sigma^\omega)$  the corresponding stochastic process. Suppose that  $\mathbb{B}$  is  $(C, \theta)$ -geometrically mixing. Suppose  $\pi$  satisfies the exploration Assumption 1 with parameter  $\varepsilon$ . Suppose the importance sampling constant  $\kappa$  in Algorithm 3 satisfies  $\kappa\varepsilon > 1$ . Let  $\widetilde{\mathbb{A}}_t = \langle \widetilde{\alpha}_t, \beta, \{A_\sigma\} \rangle$  be the WFA defined in Section 5, where the initial vector is  $\widetilde{\alpha}_t = (1/t) \sum_{s=0}^{t-1} \alpha^\top (A/\kappa)^s$ . Let  $\bar{\mathbb{A}} = \mathbb{A} \otimes \mathbb{A}_{unif}$  be the stochastic WFA  $\langle \alpha, \beta, A_\sigma / |\mathcal{A}| \rangle$  obtained by coupling the environment  $\mathbb{A}$  with the uniform random policy. Suppose  $\bar{\mathbb{A}}$  is  $(\bar{C}, \bar{\theta})$ -geometrically mixing. Let  $L = \max_{w \in \mathcal{U} \cdot \mathcal{V}} |w|$ ,  $\widetilde{m} = \sum_{u \in \mathcal{U}, v \in \mathcal{V}} \widetilde{f}_t(uv)$ , and  $\bar{m} = \sum_{u \in \mathcal{U}, v \in \mathcal{V}} \widetilde{f}_t^{unif}(uv)$ , where  $\widetilde{f}_t = f_{\widetilde{\mathbb{A}}_t}$  and  $\widetilde{f}_t^{unif}$  is the function computed by the stochastic WFA obtained by Césaro averaging  $\bar{\mathbb{A}}$  over  $t$  steps. Let  $d = \sum_{w \in \mathcal{U} \cdot \mathcal{V}} |w|_{\mathcal{U},\mathcal{V}}$ . Then for any  $\delta \in (0, 1)$  we have*

$$\mathbb{P} \left( \|\widehat{H}_{t,\xi}^{\mathcal{U},\mathcal{V}} - \widetilde{H}_t^{\mathcal{U},\mathcal{V}}\|_2 > \sqrt{\frac{\widetilde{m}}{t\varepsilon^L(1-\kappa^{-2}\varepsilon^{-2})}} + \sqrt{\frac{2\bar{m}}{t\varepsilon^{2L}} \left( L + \frac{\bar{C}}{1-\bar{\theta}} \right)} + \frac{C}{\theta(1-\theta)\varepsilon^L} \sqrt{\frac{2d \ln(1/\delta)}{t}} \right) \leq \delta.$$

---

**Proof of Theorem 6:**


---

Let us introduce the function  $g(\xi) = \|\widehat{H}_t^{\mathcal{U},\mathcal{V}} - \widetilde{H}_t^{\mathcal{U},\mathcal{V}}\|_2$ . We first control  $\|g\|_{Lip}$  then  $\mathbb{E}[g(\xi)]$ , before applying Theorem 1.

---

**Step 1: Control of  $\|g\|_{Lip}$ .**

Let  $\xi, \xi' \in \Sigma^\omega$  be trajectories  $\xi = x_1x_2 \cdots$  and  $\xi' = x'_1x'_2 \cdots$  differing by one element, say at

position  $\ell$ . That is,  $x_s = x'_s$  for all  $s \neq \ell$ . We note that

$$\begin{aligned} \left| \|\widehat{H}_{t,\xi}^{U,V} - \widetilde{H}_t^{U,V}\|_2 - \|\widehat{H}_{t,\xi'}^{U,V} - \widetilde{H}_t^{U,V}\|_2 \right| &\leq \|\widehat{H}_{t,\xi}^{U,V} - \widehat{H}_{t,\xi'}^{U,V}\|_2 \\ &\leq \sqrt{\sum_{u \in \mathcal{U}} \sum_{v \in \mathcal{V}} (\widehat{f}_{t,\xi}(uv) - \widehat{f}_{t,\xi'}(uv))^2} \\ &= \frac{1}{t} \sqrt{\sum_{u \in \mathcal{U}} \sum_{v \in \mathcal{V}} \left( \sum_{s=0}^{t-1} \varphi_{s,uv}(\xi) - \varphi_{s,uv}(\xi') \right)^2}. \end{aligned}$$

Next we take any  $w \in \mathcal{U} \cdot \mathcal{V}$  and use  $x_i = (o_i, a_i)$  to write

$$\begin{aligned} |\varphi_{s,w}(\xi) - \varphi_{s,w}(\xi')| &= \left| \frac{\mathbb{I}\{o_{s+1}a_{s+1} \cdots o_{s+|w|}a_{s+|w|} = w\}}{\kappa^s \pi(a_1 \cdots a_{s+|w|} | o_1 \cdots o_{s+|w|})} - \frac{\mathbb{I}\{o'_{s+1}a'_{s+1} \cdots o'_{s+|w|}a'_{s+|w|} = w\}}{\kappa^s \pi(a'_1 \cdots a'_{s+|w|} | o'_1 \cdots o'_{s+|w|})} \right| \\ &\leq \frac{1}{\kappa^s} \left( \frac{1}{\pi(a_1 \cdots a_{s+|w|} | o_1 \cdots o_{s+|w|})} + \frac{1}{\pi(a'_1 \cdots a'_{s+|w|} | o'_1 \cdots o'_{s+|w|})} \right) \\ &\leq \frac{2}{\kappa^s \varepsilon^{s+|w|}}, \end{aligned}$$

where we used the exploration assumption  $\pi(u^A | u^O) \geq \varepsilon^{|u|}$  for all  $u \in \Sigma^*$ .

From the expression above we see that for any  $w \in \mathcal{U} \cdot \mathcal{V}$  we have

$$\sum_{s=0}^{t-1} \varphi_{s,w}(\xi) - \varphi_{s,w}(\xi') \leq \frac{2}{(1 - 1/(\kappa\varepsilon))\varepsilon^{|w|}},$$

where we used that  $\kappa\varepsilon > 1$ . Thus, we can conclude that

$$\|g\|_{Lip} \leq \frac{2}{t(1 - 1/(\kappa\varepsilon))} \sqrt{\sum_{w \in \mathcal{U} \cdot \mathcal{V}} \frac{|w|_{\mathcal{U},\mathcal{V}}}{\varepsilon^{2|w|}}} \leq \frac{2}{t\varepsilon^L(1 - 1/(\kappa\varepsilon))} \sqrt{\sum_{w \in \mathcal{U} \cdot \mathcal{V}} |w|_{\mathcal{U},\mathcal{V}}}.$$

Note that  $d = \sum_{w \in \mathcal{U} \cdot \mathcal{V}} |w|_{\mathcal{U},\mathcal{V}}$  is the quantity defined in the statement of Theorem 3.

**Step 2: Control of  $\mathbb{E}[g(\xi)]$ .** We now want to control the following quantity  $\mathbb{E}[\|\widehat{H}_{t,\xi}^{U,\mathcal{V}} - \widetilde{H}_t^{U,\mathcal{V}}\|_2]$ . We start in the same way as in the proof of Theorem 3.

**Step 2.1.** By Jensen's inequality, the norm of  $\widehat{H}_t^{U,\mathcal{V}} - \widetilde{H}_t^{U,\mathcal{V}}$  is controlled by its Frobenius norm

$$\begin{aligned} \mathbb{E}[\|\widehat{H}_{t,\xi}^{U,\mathcal{V}} - \widetilde{H}_t^{U,\mathcal{V}}\|_2]^2 &\leq \sum_{u \in \mathcal{U}} \sum_{v \in \mathcal{V}} \mathbb{E} \left[ \left( \widehat{f}_{t,\xi}(uv) - \widetilde{f}_t(uv) \right)^2 \right] \\ &= \sum_{w \in \mathcal{U} \cdot \mathcal{V}} |w|_{\mathcal{U},\mathcal{V}} \mathbb{E} \left[ \left( \widehat{f}_{t,\xi}(w) - \widetilde{f}_t(w) \right)^2 \right]. \end{aligned}$$

Recall that in Section 5 we showed that  $\mathbb{E}[\widehat{f}_{t,\xi}(w)] = \widetilde{f}_t(w)$  for any  $w \in \Sigma^*$ . Hence the expression above is a sum of variances, each of which can be written as

$$\mathbb{E} \left[ \left( \widehat{f}_{t,\xi}(w) - \widetilde{f}_t(w) \right)^2 \right] = \mathbb{E} \left[ \widehat{f}_{t,\xi}(w)^2 \right] - \widetilde{f}_t(w)^2. \quad (8)$$

Now we recall the definitions of the quantities appearing in this expression:

$$\begin{aligned}
 \widehat{f}_{t,\xi}(w) &= \frac{1}{t} \sum_{s=0}^{t-1} \varphi_{s,w}(\xi) \\
 &= \frac{1}{t} \sum_{s=0}^{t-1} \frac{\mathbb{I}\{o_{s+1}a_{s+1} \cdots o_{s+|w|}a_{s+|w|} = w\}}{\kappa^s \pi(a_1 \cdots a_{s+|w|} | o_1 \cdots o_{s+|w|})} , \\
 \widetilde{f}_t(w) &= \frac{1}{t} \sum_{s=0}^{t-1} \frac{f_{\mathbb{A}}(\Sigma^s w)}{\kappa^s} \\
 &= \frac{1}{t} \sum_{s=0}^{t-1} \alpha^\top \left( \frac{A}{\kappa} \right)^s A_w \beta .
 \end{aligned}$$

Therefore, we can expand the squares in (8) as follows:

$$\begin{aligned}
 \mathbb{E} \left[ \widehat{f}_{t,\xi}(w)^2 \right] &= \frac{1}{t^2} \left( \sum_{s=0}^{t-1} \mathbb{E} [\varphi_{s,w}(\xi)^2] + 2 \sum_{0 \leq s < s' \leq t-1} \mathbb{E} [\varphi_{s,w}(\xi) \varphi_{s',w}(\xi)] \right) , \\
 \widetilde{f}_t(w)^2 &= \frac{1}{t^2} \left( \sum_{s=0}^{t-1} \frac{f_{\mathbb{A}}(\Sigma^s w)^2}{\kappa^{2s}} + 2 \sum_{0 \leq s < s' \leq t-1} \frac{f_{\mathbb{A}}(\Sigma^s w) f_{\mathbb{A}}(\Sigma^{s'} w)}{\kappa^{s+s'}} \right) .
 \end{aligned}$$

Using these expression we now bound the difference in (8) by considering the ‘‘squared’’ and the ‘‘cross’’ terms separately.

**Step 2.2.** We start with the ‘‘squared’’ terms and note that for any  $0 \leq s \leq t-1$  and  $w \in \mathcal{U} \cdot \mathcal{V}$  we have

$$\begin{aligned}
 \mathbb{E} [\varphi_{s,w}(\xi)^2] &= \sum_{w' \in \Sigma^s} \frac{f_{\mathbb{B}}(w'w)}{\kappa^{2s} \pi(w'^{\mathcal{A}} w^{\mathcal{A}} | w'^{\mathcal{O}} w^{\mathcal{O}})^2} \\
 &= \sum_{w' \in \Sigma^s} \frac{f_{\mathbb{A}}(w'w)}{\kappa^{2s} \pi(w'^{\mathcal{A}} w^{\mathcal{A}} | w'^{\mathcal{O}} w^{\mathcal{O}})} \\
 &\leq \frac{f_{\mathbb{A}}(\Sigma^s w)}{\kappa^{2s} \varepsilon^{s+|w|}} \\
 &= \frac{f_{\mathbb{A}}(\Sigma^s w)}{\kappa^s (\kappa \varepsilon)^s \varepsilon^{|w|}} .
 \end{aligned}$$

Using Cauchy–Schwartz to sum these terms over  $t$  we obtain:

$$\begin{aligned}
 \sum_{s=0}^{t-1} \mathbb{E} [\varphi_{s,w}(\xi)^2] &\leq \sum_{s=0}^{t-1} \frac{f_{\mathbb{A}}(\Sigma^s w)}{\kappa^s (\kappa \varepsilon)^s \varepsilon^{|w|}} \\
 &\leq \frac{1}{(1 - 1/(\kappa^2 \varepsilon^2))^{\varepsilon^{|w|}}} \left( \sum_{s=0}^{t-1} \frac{f_{\mathbb{A}}(\Sigma^s w)^2}{\kappa^{2s}} \right)
 \end{aligned}$$

Using this bound we can now see that the contribution of the ‘‘squared’’ terms to (8) is at most

$$\begin{aligned}
 \frac{1}{t^2} \left( \sum_{s=0}^{t-1} \mathbb{E} [\varphi_{s,w}(\xi)^2] - \sum_{s=0}^{t-1} \frac{f_{\mathbb{A}}(\Sigma^s w)^2}{\kappa^{2s}} \right) &\leq \frac{1}{t^2} \left( \frac{1}{(1 - 1/(\kappa^2 \varepsilon^2))^{\varepsilon^{|w|}}} - 1 \right) \left( \sum_{s=0}^{t-1} \frac{f_{\mathbb{A}}(\Sigma^s w)^2}{\kappa^{2s}} \right) \\
 &\leq \frac{1}{t^2 (1 - 1/(\kappa^2 \varepsilon^2))^{\varepsilon^{|w|}}} \left( \sum_{s=0}^{t-1} \frac{f_{\mathbb{A}}(\Sigma^s w)^2}{\kappa^{2s}} \right) .
 \end{aligned}$$

This expression can be further simplified by noting that  $\varepsilon \leq 1/|\mathcal{A}|$  implies  $\kappa > |\mathcal{A}|$  and therefore  $f_{\mathbb{A}}(\Sigma^s w)/\kappa^s \leq f_{\mathbb{A}}(\Sigma^s w)/|\mathcal{A}|^s \leq 1$  since this corresponds to the probability of observing  $w^{\mathcal{O}}$  when taking the actions in  $w^{\mathcal{A}}$  after the first  $s$  actions have been chosen by a uniform random policy. Thus, we get

$$\begin{aligned} \frac{1}{t^2} \left( \sum_{s=0}^{t-1} \mathbb{E} [\varphi_{s,w}(\xi)^2] - \sum_{s=0}^{t-1} \frac{f_{\mathbb{A}}(\Sigma^s w)^2}{\kappa^{2s}} \right) &\leq \frac{1}{t^2(1 - 1/(\kappa^2 \varepsilon^2))\varepsilon^{|w|}} \left( \sum_{s=0}^{t-1} \frac{f_{\mathbb{A}}(\Sigma^s w)}{\kappa^s} \right) \\ &= \frac{\tilde{f}_t(w)}{t(1 - 1/(\kappa^2 \varepsilon^2))\varepsilon^{|w|}} . \end{aligned}$$

To complete this step we sum this bound for all  $w \in \mathcal{U} \cdot \mathcal{V}$  to control the contribution of the ‘‘squared’’ terms in (8):

$$\begin{aligned} \sum_{w \in \mathcal{U} \cdot \mathcal{V}} |w|_{\mathcal{U}, \mathcal{V}} \frac{\tilde{f}_t(w)}{t(1 - 1/(\kappa^2 \varepsilon^2))\varepsilon^{|w|}} &\leq \frac{1}{t(1 - 1/(\kappa^2 \varepsilon^2))\varepsilon^L} \sum_{w \in \mathcal{U} \cdot \mathcal{V}} |w|_{\mathcal{U}, \mathcal{V}} \tilde{f}_t(w) \\ &= \frac{1}{t(1 - 1/(\kappa^2 \varepsilon^2))\varepsilon^L} \sum_{u \in \mathcal{U}, v \in \mathcal{V}} \tilde{f}_t(uv) , \end{aligned}$$

where  $L = \max_{w \in \mathcal{U} \cdot \mathcal{V}} |w|$ .

**Step 2.3.** We now focus on controlling the ‘‘cross’’ terms in (8) of the form

$$\mathbb{E} [\varphi_{s,w}(\xi) \varphi_{s',w}(\xi)] - \frac{f_{\mathbb{A}}(\Sigma^s w) f_{\mathbb{A}}(\Sigma^{s'} w)}{\kappa^{s+s'}} . \quad (9)$$

Using the same notation  $\Sigma_w^{s'-s} = w \Sigma^{s'-s} \cap \Sigma^{s'-s} w$  as in the proof of Theorem 3, we first note that

$$\begin{aligned} \mathbb{E} [\varphi_{s,w}(\xi) \varphi_{s',w}(\xi)] &= \sum_{x \in \Sigma^s \Sigma_w^{s'-s}} \frac{f_{\mathbb{B}}(x)}{\kappa^{s+s'} \pi(x_{1:s+|w}^{\mathcal{A}} | x_{1:s+|w}^{\mathcal{O}}) \pi(x_{1:s'+|w}^{\mathcal{A}} | x_{1:s'+|w}^{\mathcal{O}})} \\ &= \sum_{x \in \Sigma^s \Sigma_w^{s'-s}} \frac{f_{\mathbb{A}}(x)}{\kappa^{s+s'} \pi(x_{1:s+|w}^{\mathcal{A}} | x_{1:s+|w}^{\mathcal{O}})} \\ &\leq \sum_{x \in \Sigma^s \Sigma_w^{s'-s}} \frac{f_{\mathbb{A}}(x)}{\kappa^{s+s'} \varepsilon^{s+|w|}} \\ &= \frac{f_{\mathbb{A}}(\Sigma^s \Sigma_w^{s'-s})}{\kappa^{s+s'} \varepsilon^{s+|w|}} \\ &= \frac{\alpha^\top A^s A_w^{s'-s} \beta}{\kappa^{s+s'} \varepsilon^{s+|w|}} , \end{aligned}$$

where we used the notation  $A_w^{s'-s} = \sum_{x \in \Sigma_w^{s'-s}} A_x$ . We also define  $\tilde{A} = A/\kappa$  and  $\alpha_s^\top = \alpha^\top \tilde{A}^s$ . Then we can write (9) as

$$\frac{\alpha^\top A^s A_w^{s'-s} \beta}{\kappa^{s+s'} \varepsilon^{s+|w|}} - \frac{(\alpha^\top A^s A_w \beta)(\alpha^\top A^{s'} A_w \beta)}{\kappa^{s+s'}} = \alpha_s^\top \left( \frac{A_w^{s'-s}}{\kappa^{s'} \varepsilon^{s+|w|}} - A_w \beta \alpha_{s'}^\top A_w \right) \beta . \quad (10)$$

To bound this quantity we proceed by considering two cases.

**Step 2.4.** First suppose that  $s' - s \geq l = |w|$ . In this case we have  $A_w^{s'-s} = A_w A^{s'-s-l} A_w$  and (10) equals to

$$\alpha_s^\top A_w \left( \frac{A^{s'-s-l}}{\kappa^{s'} \varepsilon^{s+l}} - \beta \alpha_{s'}^\top \right) A_w \beta = \alpha_s^\top A_w \left( \frac{\tilde{A}^{s'-s-l}}{\kappa^{s+l} \varepsilon^{s+l}} - \beta \alpha_{s+l}^\top \tilde{A}^{s'-s-l} \right) A_w \beta .$$

Now we apply the same argument we used to bound the ‘‘cross’’ terms in the case of stochastic WFA using cone norms. In particular, we consider the stochastic WFA  $\bar{\mathbb{A}} = \langle \alpha, \beta, \bar{A}_\sigma \rangle$ , where  $\bar{A}_\sigma = A_\sigma / |\mathcal{A}|$ . Note this is the stochastic WFA obtained by coupling environment  $\mathbb{A}$  with the random policy that at each step chooses each action independently with probability  $1/|\mathcal{A}|$ . Now we let  $\|\cdot\|_\beta$  and  $\|\cdot\|_{\beta, \star}$  denote the cone norms corresponding to  $\bar{\mathbb{A}}$ . Using Lemma 3 we see that the following hold for all  $w \in \Sigma^*$ :

$$\begin{aligned} \|A_w \beta\|_\beta &= |\mathcal{A}|^l \|\bar{A}_w \beta\|_\beta \leq |\mathcal{A}|^l \\ \|\alpha_s^\top A_w\|_{\beta, \star} &= \frac{|\mathcal{A}|^{s+l}}{\kappa^s} \|\alpha^\top \bar{A}^s \bar{A}_w\|_{\beta, \star} = \frac{|\mathcal{A}|^{s+l}}{\kappa^s} \alpha^\top \bar{A}^s \bar{A}_w \beta, \end{aligned}$$

where we used the notation  $\bar{A} = A/|\mathcal{A}|$ . We also note that for any vector satisfying  $\|u\|_{\beta, \star} \leq 1$  we have

$$\|u^\top \beta \alpha_s^\top\|_{\beta, \star} \leq \|\alpha_s^\top\|_{\beta, \star} = \frac{|\mathcal{A}|^s}{\kappa^s} \|\alpha^\top \bar{A}^s\|_{\beta, \star} \leq \frac{|\mathcal{A}|^s}{\kappa^s} \leq \frac{1}{\kappa^s \varepsilon^s}.$$

This last bound can now be combined with the argument used in the case of stochastic WFA to show that

$$\begin{aligned} \left\| \frac{\tilde{A}^{s'-s-l}}{\kappa^{s+l} \varepsilon^{s+l}} - \beta \alpha_{s+l}^\top \tilde{A}^{s'-s-l} \right\|_\beta &= \sup_{\|u\|_{\beta, \star} \leq 1} \left\| u^\top \frac{\tilde{A}^{s'-s-l}}{\kappa^{s+l} \varepsilon^{s+l}} - u^\top \beta \alpha_{s+l}^\top \tilde{A}^{s'-s-l} \right\|_{\beta, \star} \\ &\leq \sup_{\|u_1\|_{\beta, \star} \leq 1} \sup_{\|u_2\|_{\beta, \star} \leq 1} \left\| u_1^\top \frac{\tilde{A}^{s'-s-l}}{\kappa^{s+l} \varepsilon^{s+l}} - u_2^\top \frac{\tilde{A}^{s'-s-l}}{\kappa^{s+l} \varepsilon^{s+l}} \right\|_{\beta, \star} \\ &= \frac{|\mathcal{A}|^{s'-s+l}}{\kappa^{s'} \varepsilon^{s+l}} \sup_{\|u_1\|_{\beta, \star} \leq 1} \sup_{\|u_2\|_{\beta, \star} \leq 1} \left\| u_1^\top \bar{A}^{s'-s-l} - u_2^\top \bar{A}^{s'-s-l} \right\|_{\beta, \star} \\ &\leq \frac{|\mathcal{A}|^{s'-s+l}}{\kappa^{s'} \varepsilon^{s+l}} \mu_{s'-s-l}^{\bar{\mathbb{A}}}, \end{aligned}$$

where we used the definition of the mixing coefficient  $\mu_{s'-s-l}^{\bar{\mathbb{A}}}$  for stochastic WFA  $\bar{\mathbb{A}}$ .

We now observe that  $|\mathcal{A}| \leq 1/\varepsilon < \kappa$  implies  $|\mathcal{A}|^{s'+l}/\kappa^{s+s'} \varepsilon^{s+l} \leq 1/\kappa^s \varepsilon^{s+2l}$ . Finally, by plugging all these bounds together on an application of Hölder’s inequality yields:

$$\left| \alpha_s^\top A_w \left( \frac{A^{s'-s-l}}{\kappa^{s'} \varepsilon^{s+l}} - \beta \alpha_{s'}^\top \right) A_w \beta \right| \leq \frac{\mu_{s'-s-l}^{\bar{\mathbb{A}}}}{\kappa^s \varepsilon^{s+2l}} \alpha^\top \bar{A}^s \bar{A}_w \beta.$$

**Step 2.5.** Now we consider the case  $s' - s < l = |w|$ . Using the fact that this implies  $\Sigma_w^{s'-s} \subset w \Sigma^{s'-s}$ , then

$$\alpha_s^\top A_w^{s'-s} \beta \leq \alpha_s^\top A_w A^{s'-s} \beta = |\mathcal{A}|^{s'-s} \alpha_s^\top A_w \bar{A}^{s'-s} \beta = |\mathcal{A}|^{s'-s} \alpha_s^\top A_w \beta,$$

where we used  $\bar{A} \beta = \beta$ . Therefore, we can bound the expression in (10) as

$$\begin{aligned} \alpha_s^\top \left( \frac{A_w^{s'-s}}{\kappa^{s'} \varepsilon^{s+l}} - A_w \beta \alpha_{s'}^\top A_w \right) \beta &\leq \alpha_s^\top A_w \beta \left( \frac{|\mathcal{A}|^{s'-s}}{\kappa^{s'} \varepsilon^{s+l}} - \alpha_{s'}^\top A_w \beta \right) \leq \frac{|\mathcal{A}|^{s'-s}}{\kappa^{s'} \varepsilon^{s+l}} \alpha_s^\top A_w \beta \\ &= \frac{|\mathcal{A}|^{s'+l}}{\kappa^{s'+s} \varepsilon^{s+l}} \alpha^\top \bar{A}^s \bar{A}_w \beta \leq \frac{1}{\kappa^s \varepsilon^{s+2l}} \alpha^\top \bar{A}^s \bar{A}_w \beta. \end{aligned}$$

**Step 2.6.** Finally, we can combine the bounds above by summing over all  $w \in \mathcal{U} \cdot \mathcal{V}$  and all  $0 \leq s < s' \leq t-1$  in the same way we did for PFA. We first note that from Steps 2.4 and 2.5 we obtain the

following bound for (10):

$$\alpha_s^\top \left( \frac{A_w^{s'-s}}{\kappa^{s'} \varepsilon^{s+|w|}} - A_w \beta \alpha_{s'}^\top A_w \right) \beta \leq \frac{\bar{f}_s(w)}{\kappa^s \varepsilon^{s+2|w|}} \left( \mu_{s'-s-|w|}^{\bar{\mathbb{A}}} \mathbb{I}\{s' - s \geq |w|\} + \mathbb{I}\{s' - s < |w|\} \right).$$

Now let  $l = |w|$  and note that  $\mu_{s'-s-l}^{\bar{\mathbb{A}}} \leq \bar{C} \bar{\theta}^{s'-s-l}$ , where  $\bar{C}$  and  $\bar{\theta}$  are the geometric mixing constants for stochastic WFA  $\bar{\mathbb{A}}$ . Thus, summing first over  $s'$  we get

$$\sum_{s'=s+1}^{t-1} \mu_{s'-s-|w|}^{\bar{\mathbb{A}}} \mathbb{I}\{s' - s \geq |w|\} + \mathbb{I}\{s' - s < |w|\} \leq l + \frac{\bar{C}}{1 - \bar{\theta}}.$$

Therefore, writing  $\mathcal{W}_l$  for all words of length  $l$  in  $\mathcal{W} = \mathcal{U} \cdot \mathcal{V}$  we get:

$$\begin{aligned} & \frac{2}{t^2} \sum_{w \in \mathcal{U} \cdot \mathcal{V}} |w|_{\mathcal{U}, \mathcal{V}} \sum_{0 \leq s < s' \leq t-1} \left( \mathbb{E}[\varphi_{s,w}(\xi) \varphi_{s',w}(\xi)] - \frac{f_{\mathbb{A}}(\Sigma^s w) f_{\mathbb{A}}(\Sigma^{s'} w)}{\kappa^{s+s'}} \right) \\ & \leq \frac{2}{t^2} \sum_{l=0}^{\infty} \sum_{w \in \mathcal{W}_l} \frac{|w|_{\mathcal{U}, \mathcal{V}}}{\varepsilon^{2l}} \left( l + \frac{\bar{C}}{1 - \bar{\theta}} \right) \sum_{s=0}^{t-2} \frac{\bar{f}_s(w)}{\kappa^s \varepsilon^s} \\ & \leq \frac{2}{t} \sum_{l=0}^{\infty} \frac{1}{\varepsilon^{2l}} \left( l + \frac{\bar{C}}{1 - \bar{\theta}} \right) \sum_{w \in \mathcal{W}_l} |w|_{\mathcal{U}, \mathcal{V}} \sum_{s=0}^{t-1} \frac{\bar{f}_s(w)}{t} \\ & \leq \frac{2}{t \varepsilon^{2L}} \left( L + \frac{\bar{C}}{1 - \bar{\theta}} \right) \sum_{u \in \mathcal{U}, v \in \mathcal{V}} \tilde{f}_t^{unif}(uv), \end{aligned}$$

where we used that  $\kappa \varepsilon > 1$  and  $\tilde{f}_t^{unif}(w) = (1/t) \sum_{s=0}^{t-1} \bar{f}_s(w)$ .

**Step 2.7.** Our final bound for  $\mathbb{E}[\|\hat{H}_{t,\xi}^{\mathcal{U}, \mathcal{V}} - \tilde{H}_t^{\mathcal{U}, \mathcal{V}}\|_2]$  is now obtained by combining the results from Step 2.2 and 2.6:

$$\mathbb{E}[\|\hat{H}_{t,\xi}^{\mathcal{U}, \mathcal{V}} - \tilde{H}_t^{\mathcal{U}, \mathcal{V}}\|_2]^2 \leq \frac{1}{t \varepsilon^L (1 - 1/(\kappa \varepsilon)^2)} \sum_{u \in \mathcal{U}, v \in \mathcal{V}} \tilde{f}_t(uv) + \frac{2}{t \varepsilon^{2L}} \left( L + \frac{\bar{C}}{1 - \bar{\theta}} \right) \sum_{u \in \mathcal{U}, v \in \mathcal{V}} \tilde{f}_t^{unif}(uv).$$

Note that  $\tilde{m} = \sum_{u \in \mathcal{U}, v \in \mathcal{V}} \tilde{f}_t(uv)$  and  $\bar{m} = \sum_{u \in \mathcal{U}, v \in \mathcal{V}} \tilde{f}_t^{unif}(uv)$  are the quantities defined in the statement of Theorem 6.

**Step 3. Application of Theorem 1** It follows directly from Theorem 1 that with probability at least  $1 - \delta$  we have

$$\|\hat{H}_{t,\xi}^{\mathcal{U}, \mathcal{V}} - \tilde{H}_t^{\mathcal{U}, \mathcal{V}}\|_2 \leq \mathbb{E}[\|\hat{H}_{t,\xi}^{\mathcal{U}, \mathcal{V}} - \tilde{H}_t^{\mathcal{U}, \mathcal{V}}\|_2] + \eta_{\rho_{\mathbb{B}}} \|g\|_{Lip} \sqrt{\frac{t \ln(1/\delta)}{2}}.$$

Using that  $\rho_{\mathbb{B}}$  is  $(C, \theta)$ -geometrically mixing and Lemma 4 we can bound the  $\eta$ -mixing coefficient as  $\eta_{\rho_{\mathbb{B}}} \leq C/(\theta(1 - \theta))$ . Thus, by plugging our estimates for  $\|g\|_{Lip}$  and  $\mathbb{E}[\|\hat{H}_{t,\xi}^{\mathcal{U}, \mathcal{V}} - \tilde{H}_t^{\mathcal{U}, \mathcal{V}}\|_2]$  we obtain that with probability at least  $1 - \delta$ :

$$\|\hat{H}_{t,\xi}^{\mathcal{U}, \mathcal{V}} - \tilde{H}_t^{\mathcal{U}, \mathcal{V}}\|_2 \leq \sqrt{\frac{\tilde{m}}{t \varepsilon^L (1 - \kappa^{-2} \varepsilon^{-2})}} + \sqrt{\frac{2\bar{m}}{t \varepsilon^{2L}} \left( L + \frac{\bar{C}}{1 - \bar{\theta}} \right)} + \frac{C}{\theta(1 - \theta) \varepsilon^L} \sqrt{\frac{2d \ln(1/\delta)}{t}}. \quad \square$$
